# Supplementary material for: HDAC Inhibition Restores Response to HER2-Targeted Therapy in Breast Cancer via PHLDA1 Induction
Source: MDPI journal article supplement (doi:10.3390/ijms24076228), 2023-03-25
Supplement: s1 [file s1]

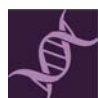

**Supplementary Table S1**

| Cell Line | Origin                                                         | Mutations                                                                                          |
|-----------|----------------------------------------------------------------|----------------------------------------------------------------------------------------------------|
| HCC1954   | Breast ductal carcinoma, <i>HER2</i> amplified                 | PI3K <sup>H1047R</sup> , P53 <sup>Y163C</sup>                                                      |
| SKBR3     | Breast adenocarcinoma, pleural effusion, <i>HER2</i> amplified | P53 <sup>R175H</sup>                                                                               |
| MFE-296   | Endometrial adenocarcinoma                                     | FGFR2 <sup>N550K, K310R</sup> , PTEN <sup>P130Q, N323fs*</sup> ,<br>PI3K <sup>P539R, I20M</sup>    |
| ANC3A     | Endometrial adenocarcinoma, lymph node metastasis              | FGFR2 <sup>N550K, K310R</sup> , PTEN <sup>R130fs*1</sup> ,<br>p85 $\alpha$ <sup>R557_D560del</sup> |

**Supplementary Table S2**

| Primer Pair | Forward Primer        | Reverse Primer          |
|-------------|-----------------------|-------------------------|
| Control     | CCCATGGGAATGCCTTGTCT  | TGCCCTTCAATCTTCACGCT    |
| PHLDA1_1    | CGTCCCACCTTCCTCAAGTCC | TCTCGGAGGGTTCTTAGCCA    |
| PHLDA1_2    | TCAAGTGTGCAAAGCTCTCG  | GGCCTTTTGACTGATTTGTGAGT |
| PHLDA1_3    | TTGAATGGGCCATCTTCCCC  | CCAAGTTAATGAGGCGTGCG    |
| PHLDA1_4    | CTCCATACAGGAGCCGAACC  | CGGGCAAGACAAGGTAAGGT    |
| PHLDA1_5    | CCCGTCTTCGGCTTTCTTCT  | AGATCTGGCTAGGCCTTGGA    |
| PHLDA1_6    | TCCAAC TGCTTACTGCCGAA | AGTGTTCCCTTGCCTGGTATG   |
| PHLDA1_7    | CATGATTCCGGTGGCCCTAT  | CCCTCTTGGTGGCTGGATTT    |
